# Supplementary material
Source: PubMed Central journal article supplement (PMC9583708)
Supplement: NIHMS1782040-supplement-Supplementary_material.pdf [file NIHMS1782040-supplement-Supplementary_material.pdf]

**ADVANCED  
HEALTHCARE  
MATERIALS**

Supporting Information

for *Adv. Healthcare Mater.*, DOI: 10.1002/adhm.202101826

Wireless Force-Inducing Neuronal Stimulation Mediated by  
High Magnetic Moment Microdiscs

*Claudia Collier, Nicolas Muzzio, Rohini Guntnur, Amanda Gomez,  
Carolina Redondo, Raquel Zurbano, Ivan K. Schuller, Carlos Monton,  
Rafael Morales\* and Gabriela Romero\**

## Supporting Information

**Wireless Force-Inducing Neuronal Stimulation Mediated by High Magnetic Moment Microdiscs**

*Claudia Collier, Nicolas Muzzio, Rohini Guntnur, Amanda Gomez, Carolina Redondo, Raquel Zurbano, Ivan K. Schuller, Carlos Monton, Rafael Morales\* and Gabriela Romero\**

The following videos are available:

- **Video S1.** MMDs behavior under applied AMFs.
- **Video S2.** Force-inducing hippocampal neural stimulation mediated by MMDs.
- **Video S3.** Force-inducing cortical neural stimulation mediated by MMDs.
- **Video S4.** Force-inducing cortical neural stimulation mediated by MMDs on neurons pretreated with the global inhibitor for mechanosensitive channels  $Gd^{3+}$ .

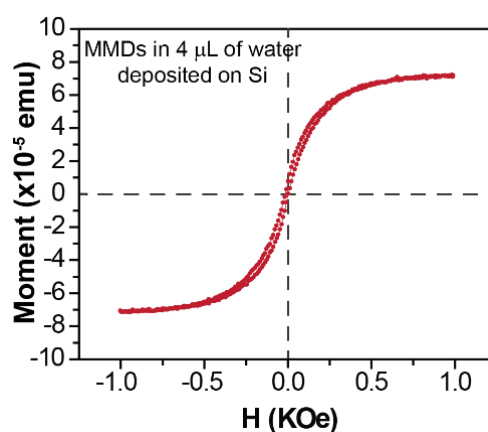

**Figure S1.** Hysteresis loop of released MMDs dispersed and dried on a Si substrate (estimated concentration  $\sim 6.4 \times 10^4$  MMDs  $mL^{-1}$ ).

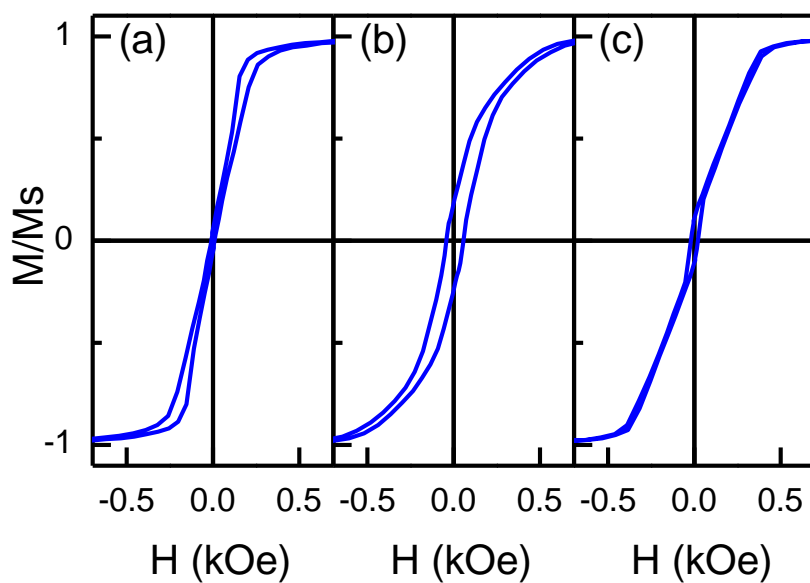

**Figure S2.** Hysteresis loops of Permalloy ( $\text{Ni}_{80}\text{Fe}_{20}$ ) MMDs of diameter  $4\ \mu\text{m}$  and thickness; (a) Py 100 nm; (b) Py 200 nm; (c) stacking structure Py (100)/Ti (20)/Py (100) [nm].

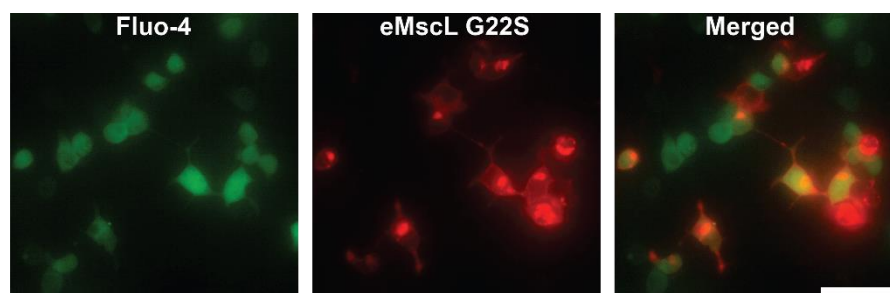

**Figure S3.** HEK293 cells labelled with the calcium indicator Fluo-4 (green) and transfected with the large conductance mechanosensitive ion channel eMscL G22S (red) using Lipofectamine 3000. Merged image shows cells label with both Fluo-4 and eMscL. Particularly, eMscL is shown to be inserted only in the cell membrane. Scale bar =  $50\ \mu\text{m}$ .

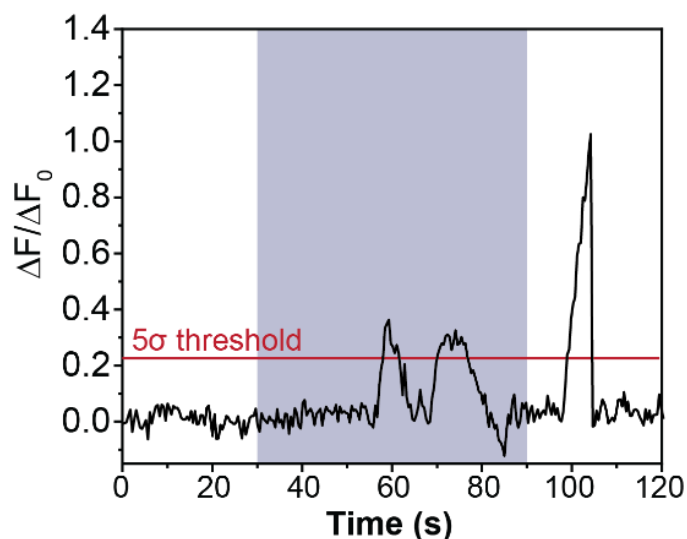

**Figure S4.** The Calcium fluorescence intensity for a representative neuron recorded during a 120 second trial. A threshold set at five standard deviations ( $5\sigma$ ) above background noise (red line) was used to classify neurons as momentarily active or inactive.

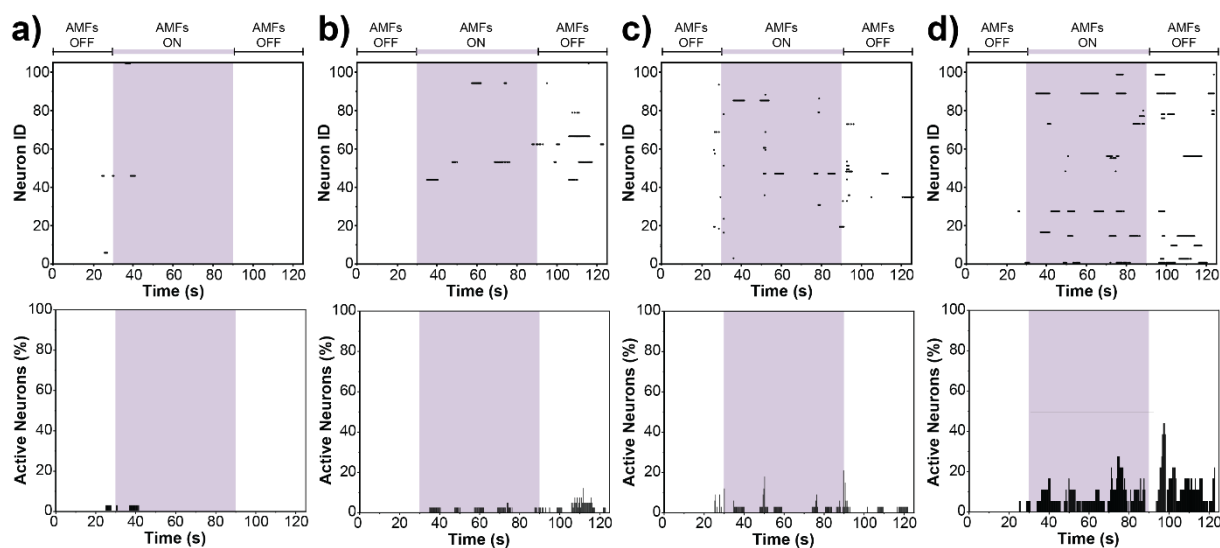

**Figure S5.** Raster plot tracking and percentage of active neurons from 100 random hippocampal neurons: **(a)** expressing eMscL in the absence of MMDs and AMFs; **(b)** expressing eMscL in the absence of MMDs and subjected to AMFs stimulation; **(c)** expressing eMscL, co-cultured with MMDs and with no AMFs stimulation; and **(d)** not transfected with eMscL in the presence of MMDs and AMFs.

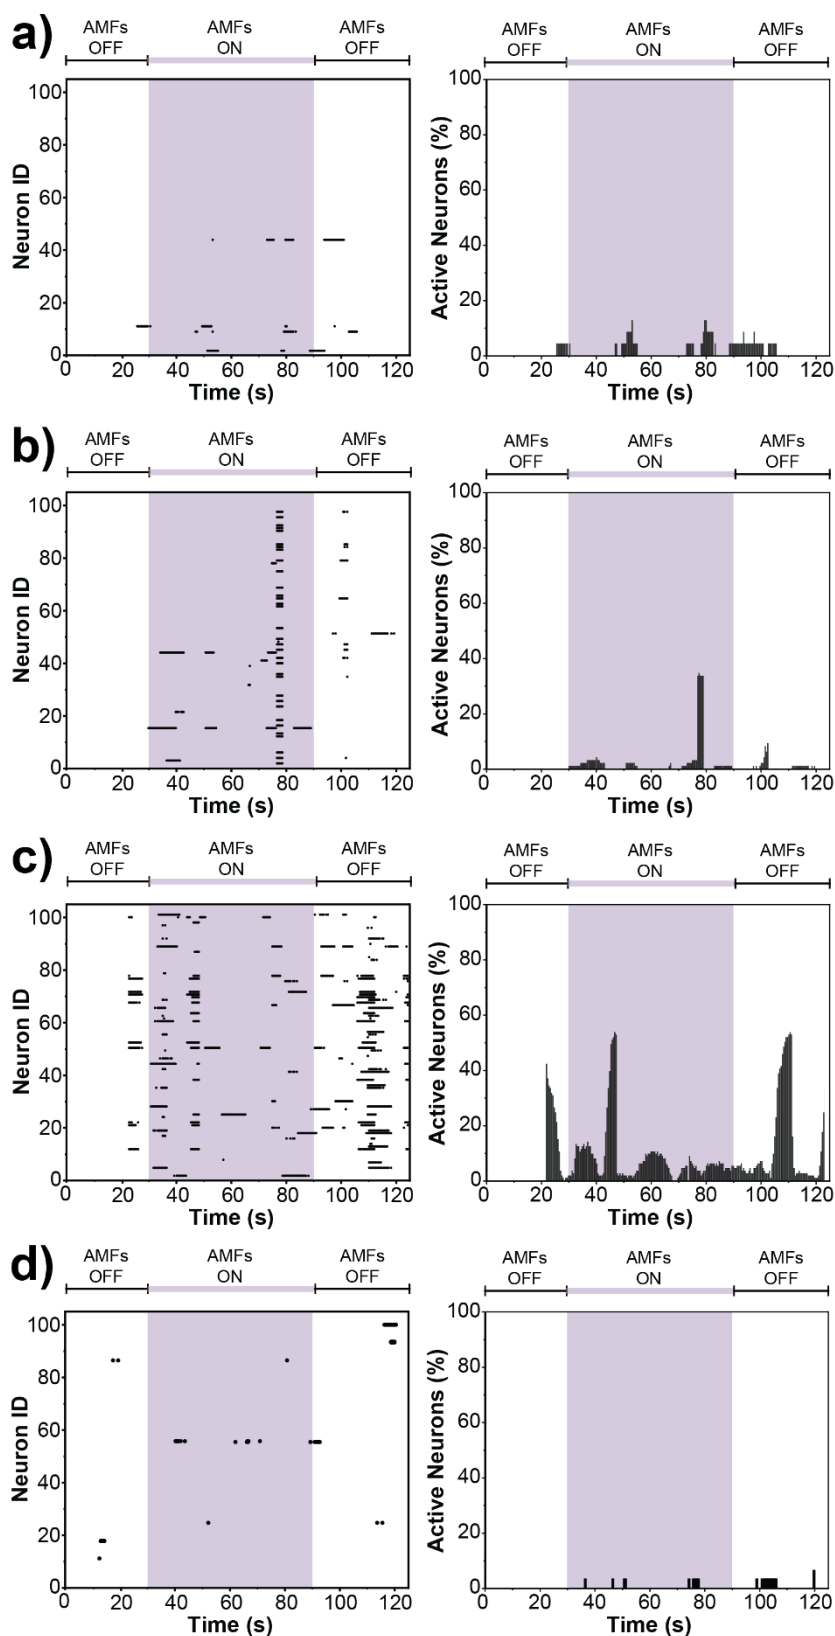

**Figure S6.** Raster plot tracking and percentage of active neurons from 100 random cortical neurons: (a) in the absence of MMDs and AMFs; (b) co-cultured with MMDs and with no AMFs stimulation; (c) in the absence of MMDs and subjected to AMFs stimulation; and (d) pretreated with  $Gd^{3+}$ , in the presence of MMDs and subjected to AMFs stimulation.

**Supplementary Note. Algorithm for quantifying neural activity based on the Calcium fluorescence intensity of Fluo-4.**

The intensity vs time data was acquired by the 'Time Series Analyzer' Image J plugin for each cell in each video. These data were then analyzed using a MATLAB code executing the following algorithm for each cell:

1. The data was divided into 5 equal segments and each segment was fitted into a polynomial regression to subtract the baseline.
2. The first 20 s of the data set were used as a reference for background noise and a threshold of 5 times standard deviation ( $5\sigma$ ) was chosen to identify neural activity. See Figure S3 for an example of fluorescence thresholding.
3. All values above the  $5\sigma$  threshold were considered as neural activity and a matrix of 0 (no activity) and 1 (activity) was generated.
4. Finally, because different numbers of cells were counted in each video across 5 trials, a sample containing the activity information of 100 cells was automatically randomly picked.

The MATLAB code is provided below:

```
function output = checkDataSample(time, noisy_data, num_sample)
% CHECKDATASAMPLE Detrends a random sample of noisy data and returns a boolean
% matrix such that output(i,j) == 1 if the detrended value for column j time step i > 5 standard
% deviations of the first 20 seconds.
    clean_data = noisy_data;
    data_size = size(noisy_data);
    for i=1:data_size(2)
        start = 0;
        batch_size = size(noisy_data,1)/5;
        f_y = noisy_data(:,i);
        for j=0:4
            start = j*batch_size+1;
            last = j*batch_size+batch_size;
            % if last is > size of data, then make last = last row of noisy data.
            if last > size(noisy_data, 1)
                last = size(noisy_data,1);
            end
            size(noisy_data(start:last, i));
            % Fits a linear regression for column i from time start to last.
            [p,s,mu] = polyfit(time(start:last),noisy_data(start:last,i),1);
            f_y(start:last) = polyval(p,time(start:last),[],mu);
        end
        % Subtracts the linear trends from the noisy data.
        clean_data(:,i) = noisy_data(:,i) - f_y;
        % Plots the noisy and detrended data.
        plot(time, clean_data(:,i));
        figure;
        plot(time, noisy_data(:,i));
    end

    output = clean_data;
    % Calculates the standard deviations for the first 20 seconds.
```

```
std_devs = std(clean_data(time<=20,:));  
% Creates the boolean output matrix (1 if output(i,j)> 5*std_dev otherwise 0).  
for i=1:length(std_devs)  
    output(:, i) = output(:, i) >= 5*std_devs(i);  
end  
  
numCols = size(output,2);  
idxs = 1:numCols;  
% Samples without replacement num_sample columns of the output matrix.  
sampleIdxs = datasample(idxs, num_sample, 'Replace', false);  
size(output)  
output = output(:,sampleIdxs);  
end
```
